# Supplementary material for: Identification and Functional Characterization of a Putative Alternative Oxidase (Aox) in Sporisorium reilianum f. sp. zeae
Source: MDPI journal article supplement (doi:10.3390/jof8020148), 2022-01-31
Supplement: s1 [file s1]

# Identification and functional characterization of a putative alternative oxidase (AOX) in *Sporisorium reilianum* f. *sp. zeae*

Hector Mendoza <sup>1</sup>, Caroline D. Culver <sup>1</sup>, Emma A. Lamb <sup>1</sup>, Luke A. Schroeder <sup>1</sup>, Sunita Khanal <sup>2</sup> and Michael H. Perlin <sup>1,\*</sup>

<sup>1</sup>Department of Biology, Program on Disease Evolution, University of Louisville, Louisville, KY, USA;

<sup>2</sup>Division of Cardiovascular Medicine, School of Medicine, University of Maryland, Baltimore, MD;

\*Correspondence: michael.perlin@louisville.edu

## Supporting Information

Figure S1 – Growth inhibition assay of complemented SRZ $\Delta$ aox strains

Figure S2 - Fold change differences of AOX expression in teliospores and haploid cells of SRZ in reference to SRZ2

Table S1 – Strains used and generated in this study

Table S2 – Primers used in this study

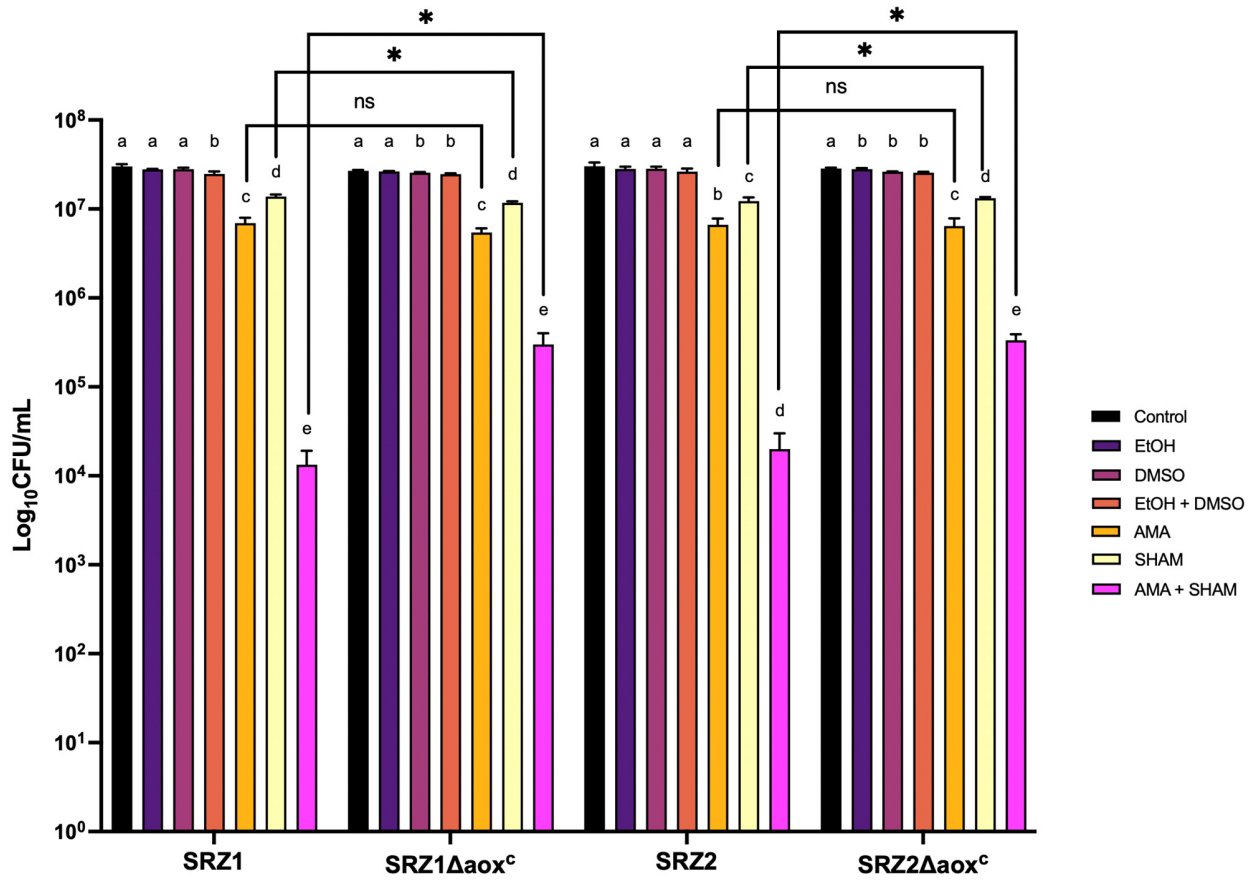

**Figure S1: Growth inhibition assay of complemented SRZΔaox strains.** 10<sup>5</sup> cells/mL were treated as indicated on the right and incubated at 28°C for 24 hours. Control groups consisted of untreated cells grown in PD broth. AMA and SHAM were used at concentrations of 50 μM and 2 mM, respectively. Cultures were then plated onto PD agar to determine the number of surviving colonies. Bars represent averages of biological triplicates with standard errors indicated. One-way ANOVA followed by Tukey's Multiple Comparison Test was performed in Graphpad 9.0. Letters above bars represent significant differences (p < 0.05) between the different treatments in reference to the corresponding control group of each strain. Comparisons of treatments between different strains are indicated by connecting black line brackets, with p < 0.05 represented by "\*" (significant) and p > 0.05 represented by "ns" (not significant).

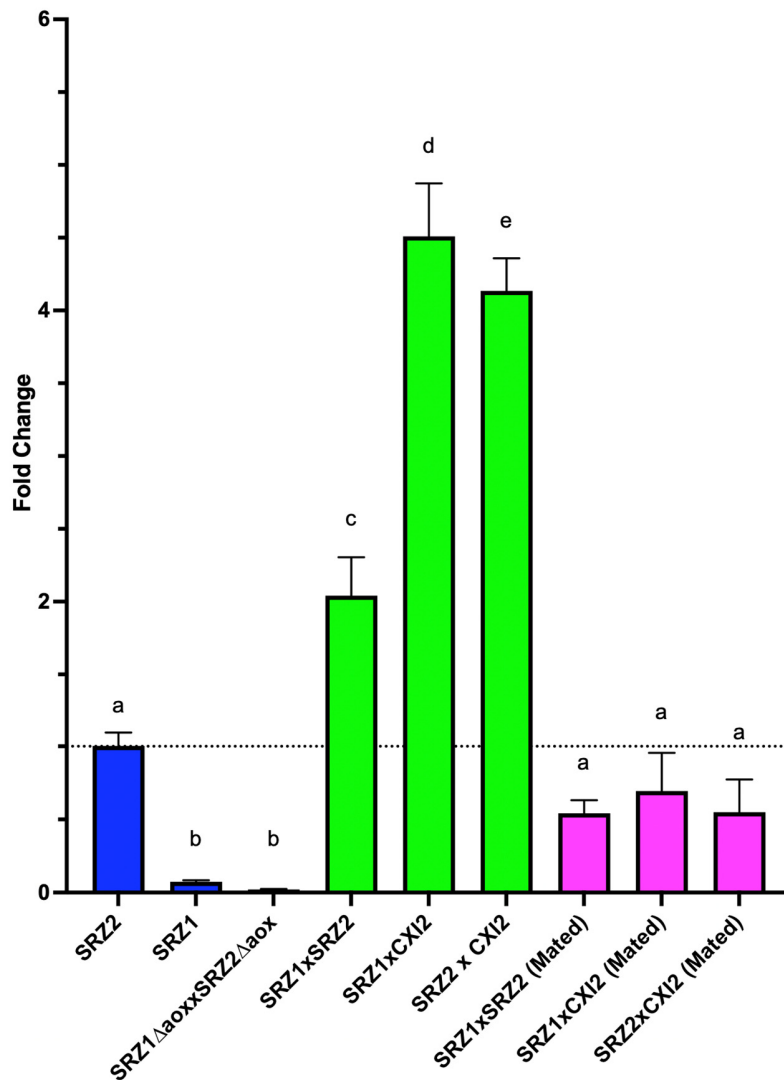

**S2 – Fold change differences of *aox* expression in teliospores and haploid cells of SRZ in reference to SRZ2.** Analysis was done relative to *gapdh* expression as endogenous control. Relative expression levels were calculated using the  $2^{-\Delta\Delta C_t}$  method and were done in reference to strain SRZ2. Teliospores produced in a cross between *aox* deletion mutants and mated cells were included as controls. Colored bars correspond to cell type analyzed: blue = haploid cells, green = teliospores and pink = mated cells. One-way ANOVA followed by Tukey's Multiple Comparison Test was performed in Graphpad 9.0. Significant differences are indicated with letters above bars ( $p < 0.05$ ).

| <b>Table S1 – SRZ strains used or generated in this study.</b> |                  |                          |                                                  |
|----------------------------------------------------------------|------------------|--------------------------|--------------------------------------------------|
| <b>Strain</b>                                                  | <b>Genotype</b>  | <b>Selectable marker</b> | <b>Source</b>                                    |
| SRZ2                                                           | a2b2             | WT                       | [2]                                              |
| SRZ1                                                           | a1b1             | WT                       | [2]                                              |
| SRZCXI2                                                        | a3b3             | WT                       | Unpublished, from teliospores collected in China |
| SRZ2Δaox #1                                                    | a2b2Δaox::hph    | Hygromycin               | This study                                       |
| SRZ1Δaox #2                                                    | a1b1Δaox::hph    | Hygromycin               | This study                                       |
| SRZCXI2Δaox #4                                                 | a3b3Δaox::hph    | Hygromycin               | This study                                       |
| SRZ2Δaoxc #1                                                   | a2b2Δaox::aoxsdh | Carboxin                 | This study                                       |
| SRZ1Δaoxc #1                                                   | a2b2Δaox::aoxsdh | Carboxin                 | This study                                       |
| SRZ2aox-eGFP #1                                                | a2b2aox::hph     | Hygromycin               | This study                                       |
| SRZ2aox-eGFP #1                                                | a1b1aox::hpc     | Hygromycin               | This study                                       |

**Table 2 – Primers used in this study.**

| Running # | Sequence (5'→3')                    | Amplicon                                           |
|-----------|-------------------------------------|----------------------------------------------------|
| oHM33     | ACCATCCCTCTAAAACGACGGCCAGTGAAT      | <i>hph</i> (2027 bp)                               |
| oHM34     | AGTTTCGATTCTGTGGAATTGTGAGCGGATA     |                                                    |
| oHM35     | CGTCGTTTTAGAGGGATGGTTGTGAAATGG      | Upstream flanking region of <i>aox</i> (1285 bp)   |
| oHM36     | TTTTGATATCAAGCATGGTGACGAGGAGAT      |                                                    |
| oHM37     | CAATTCCACAGAATCGAACTGGCGAATGTC      | Downstream flanking region of <i>aox</i> (1270 bp) |
| oHM38     | TTCAATATTAATTAAGGTGATGAAGGAACGAACG  |                                                    |
| oHM39     | CATGCTTGATATCAAAAGGCCGCGTTGCTG      | <i>amp<sup>r</sup></i> , <i>ori</i> (1688 bp)      |
| oHM40     | ATCACCTTTAATTAATATTGAAAAAGGAAGAG    |                                                    |
| oHM61     | GAAAAGACCGTGGCTCTCC                 | <i>aox</i> for qRT-PCR                             |
| oHM62     | GTGCTTCACTGGCATCGTC                 |                                                    |
| oHM70     | TTTTGATATCCGACTTTTCGGGTGATTTTC      | For AOX-eGFP fusion construct                      |
| oHM102    | GAAGACCGCCATGGTGAGCAAGGGCGAG        |                                                    |
| oHM103    | CGTCGTTTTATTCTTGTGATTCGGGGACTC      |                                                    |
| oHM104    | TGCTCACCATGGCGGTCTTCTCAGCAGC        |                                                    |
| oHM105    | ATCACAAGAATAAAACGACGGCCAGTGAAT      |                                                    |
| oHM146    | CGAAAAGTCGGATATCAAAAGGCCGCGTTG      | For AOX complementation construct                  |
| oHM147    | TTTTGATATCCGACTTTTCGGGTGATTTTC      |                                                    |
| oHM148    | GCTCGATATTGGTGGTAAGGGTATCGGACA      |                                                    |
| oHM149    | CCTTACCACCAATATCGAGCACGTTGATGG      |                                                    |
| oHM155    | CCACAATCGTGAATCGAACTGGCGAATGTC      |                                                    |
| oHM156    | AGTTTCGATTCACGATTGTGGCGAATCGCGG     |                                                    |
| oHM30     | TTCAATATTAATTAAGGTATGCCTCAGCTCAAAGG |                                                    |
| oYZ58     | GGATTTTCATCGGCAACTCAC               | <i>gapdh</i> for qRT-PCR[1]                        |
| oYZ59     | TACCACGAGACGAGCTTGAC                |                                                    |
